# Supplementary material
Source: PubMed Central journal article supplement (PMC3104753)
Supplement: JCI45213sd.pdf [file JCI45213sd.pdf]

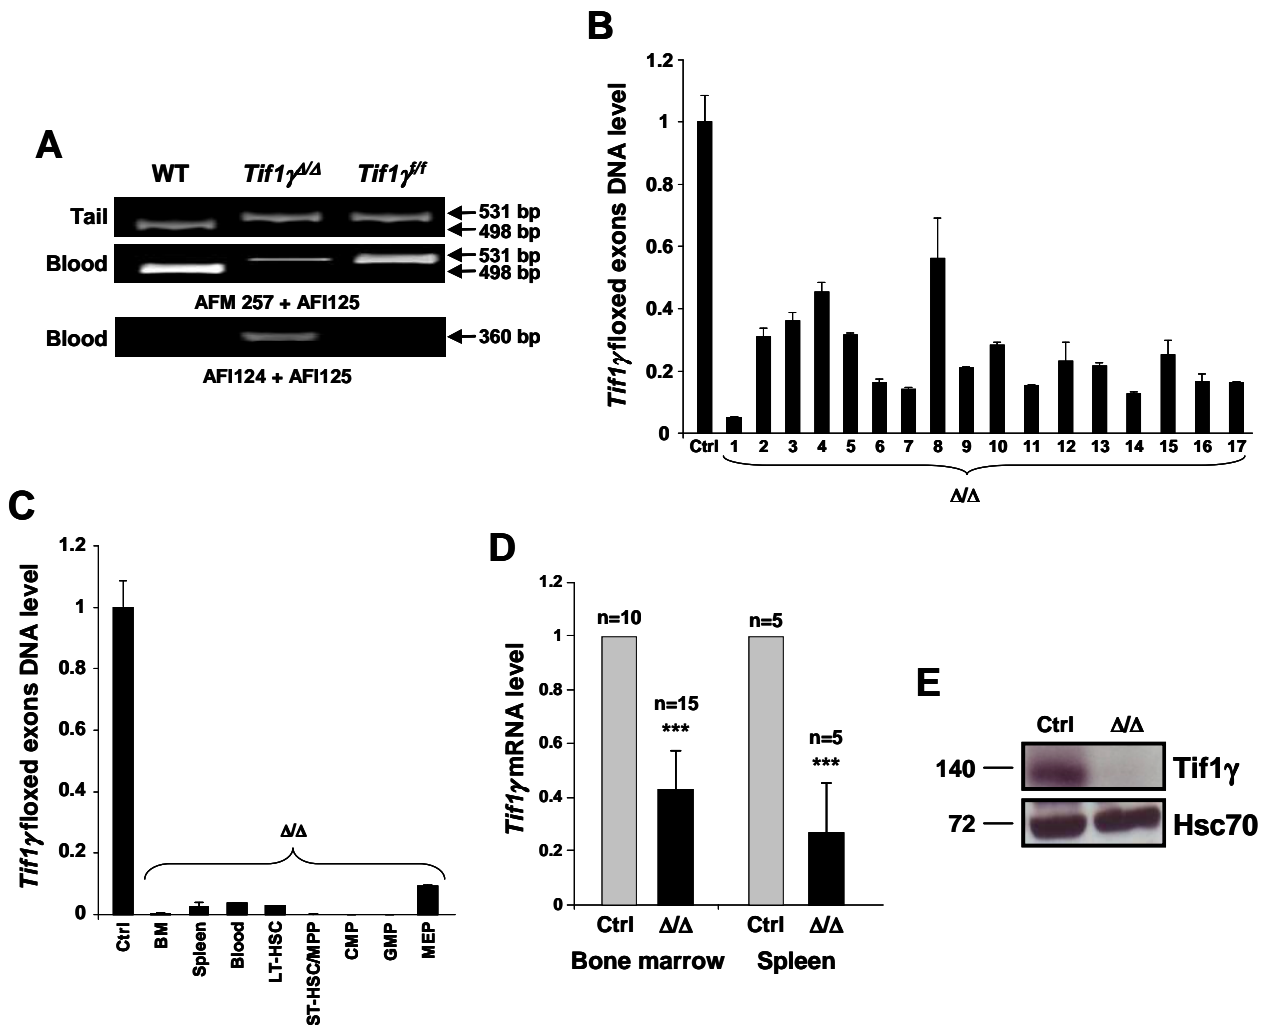

**Supplemental figure 1. Genotyping and *Tif1γ* expression in *Tif1γ<sup>Δ/Δ</sup>* mice.** (A) Representative PCR analysis of genomic DNA from tail or blood of wild type (WT), *Tif1γ<sup>Δ/Δ</sup>* ( $\Delta/\Delta$ ), and *Tif1γ<sup>ff</sup>* mice using a mixture of two primers. Amplification of the WT allele by forward and reverse primers AFM257 and AFI125 produces a 498 bp DNA fragment (lower band) while amplification of the floxed (f) allele results in a 531 bp DNA fragment (upper band), and amplification of the deleted ( $\Delta$ ) allele by forward and reverse primers AFI124 and AFI125 produces a 360 bp DNA fragment. (B) Q-PCR analysis of the *Tif1γ* floxed exons in peripheral blood cells from control (Ctrl) or *Tif1γ<sup>Δ/Δ</sup>* ( $\Delta/\Delta$ ) mice. Data are the means  $\pm$  s.d. of the values from experiments performed in triplicate. (C) *Tif1γ* deletion, by Q-PCR analysis, in various hematopoietic tissues or cells. (D) RQ-PCR analysis of *Tif1γ* from total BM or spleen cells of control (Ctrl) or *Tif1γ<sup>Δ/Δ</sup>* ( $\Delta/\Delta$ ) mice. Data are the means  $\pm$  s.d. of the values from independent experiments (\**p* values are defined in Methods). (E) *Tif1γ* expression is decreased in *Tif1γ<sup>Δ/Δ</sup>* ( $\Delta/\Delta$ ) mice. Protein extracts were prepared from BM cells of control (Ctrl) or *Tif1γ<sup>Δ/Δ</sup>* ( $\Delta/\Delta$ ) mice then were electrophoresed on SDS-PAGE and immunoblotted with anti-*Tif1γ* antibody. Equivalent loading of lanes was controlled by the use of an anti-Hsc70 antibody.

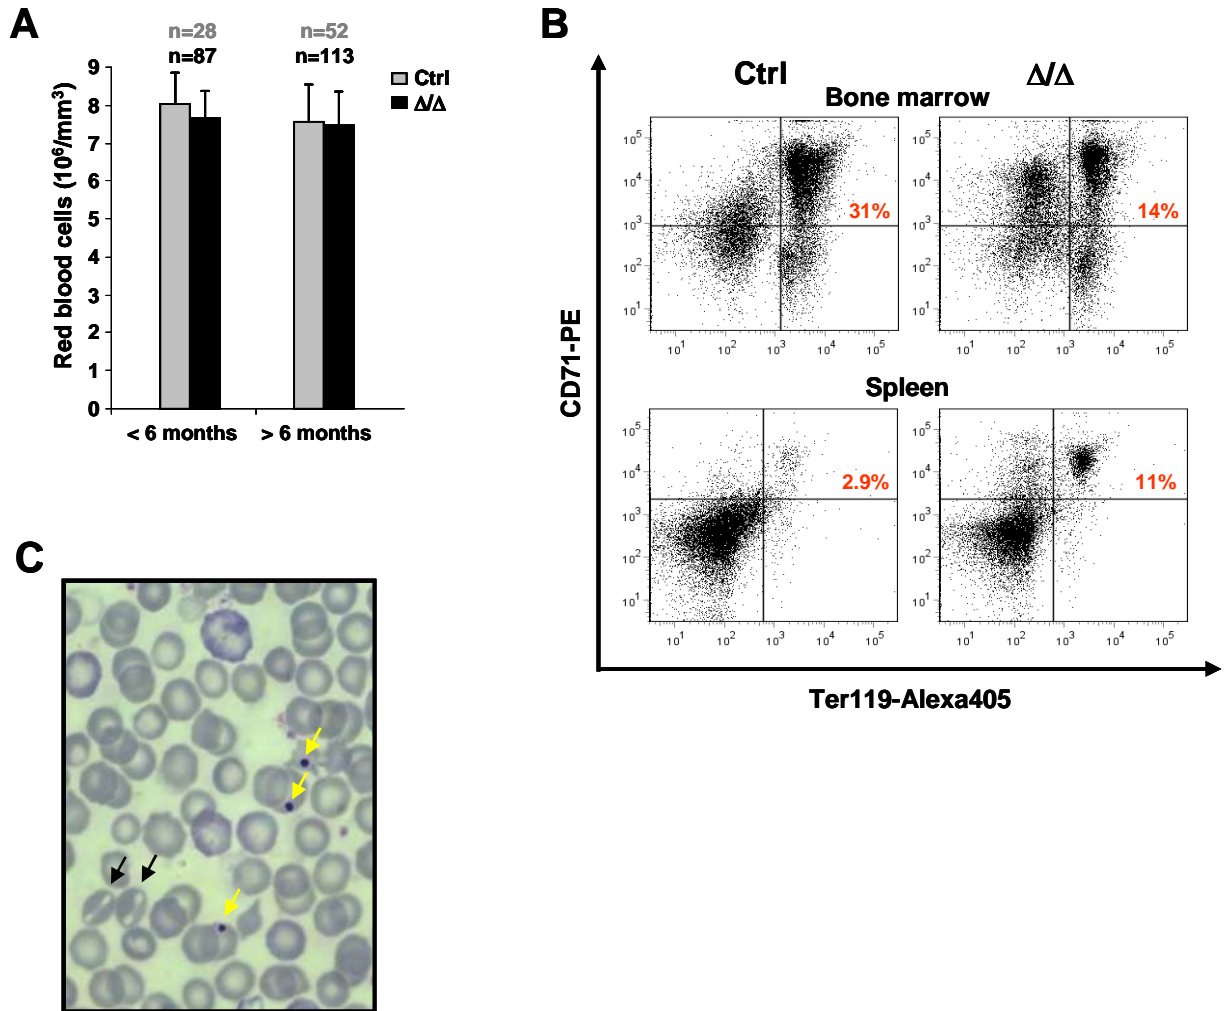

**Supplemental figure 2. Erythroid defects in *Tif1* <sup>$\Delta/\Delta$</sup>  mice.** (A) Peripheral erythrocyte counts in control (Ctrl) and *Tif1* <sup>$\Delta/\Delta$</sup>  ( $\Delta/\Delta$ ) mice, younger or older than 6 months. The results are shown as the means  $\pm$  s.d. (B) FACS analysis of cell populations from BM and spleen of representative control (Ctrl) and *Tif1* <sup>$\Delta/\Delta$</sup>  ( $\Delta/\Delta$ ) mice, older than 6 months demonstrated a decrease in BM associated with an increase in spleen of erythroblastic populations (Ter119<sup>+</sup>CD71<sup>+</sup>) in *Tif1* <sup>$\Delta/\Delta$</sup>  mice. (C) Representative MGG stained peripheral blood smears ( $\times 100$ ) from *Tif1* <sup>$\Delta/\Delta$</sup>  ( $\Delta/\Delta$ ) mice, older than 6 months, demonstrated the presence of Howell-Jolly bodies (yellow arrows) and stomatocytes (black arrows).

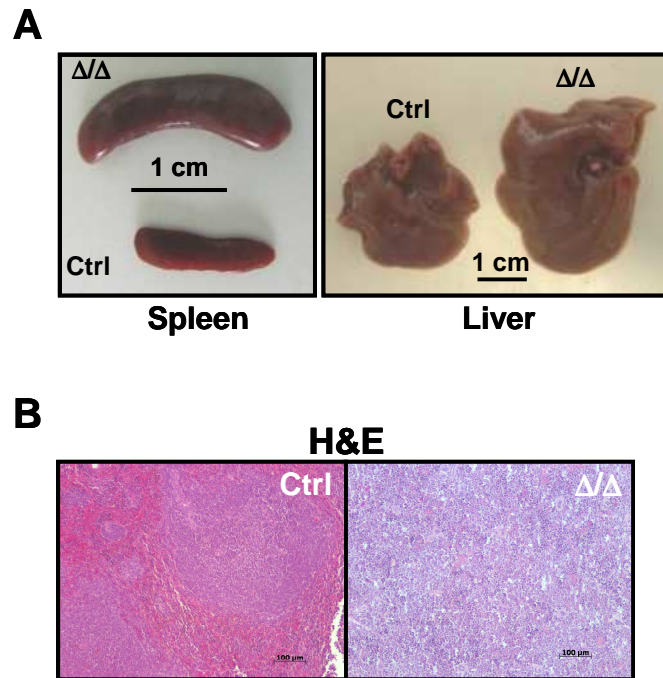

**Supplemental figure 3. Hepatosplenomegaly in *Tif1* <sup>$\gamma^{A/\Delta}$</sup>  mice.** (A) Marked splenomegaly (left panel) in a *Tif1* <sup>$\gamma^{A/\Delta}$</sup>  ( $\Delta/\Delta$ ) mouse (top) as compared with the spleen of a wild-type sex and age-matched control (Ctrl) mouse (bottom). Marked hepatomegaly (right panel) in a *Tif1* <sup>$\gamma^{A/\Delta}$</sup>  ( $\Delta/\Delta$ ) mouse (right) as compared with the liver of a wild-type sex and age-matched control (Ctrl) mouse (left). (B) H&E staining of paraffin-embedded spleen sections from representative control (Ctrl) or *Tif1* <sup>$\gamma^{A/\Delta}$</sup>  ( $\Delta/\Delta$ ) mice demonstrated the infiltration of hematopoietic populations in *Tif1* <sup>$\gamma^{A/\Delta}$</sup>  mice.

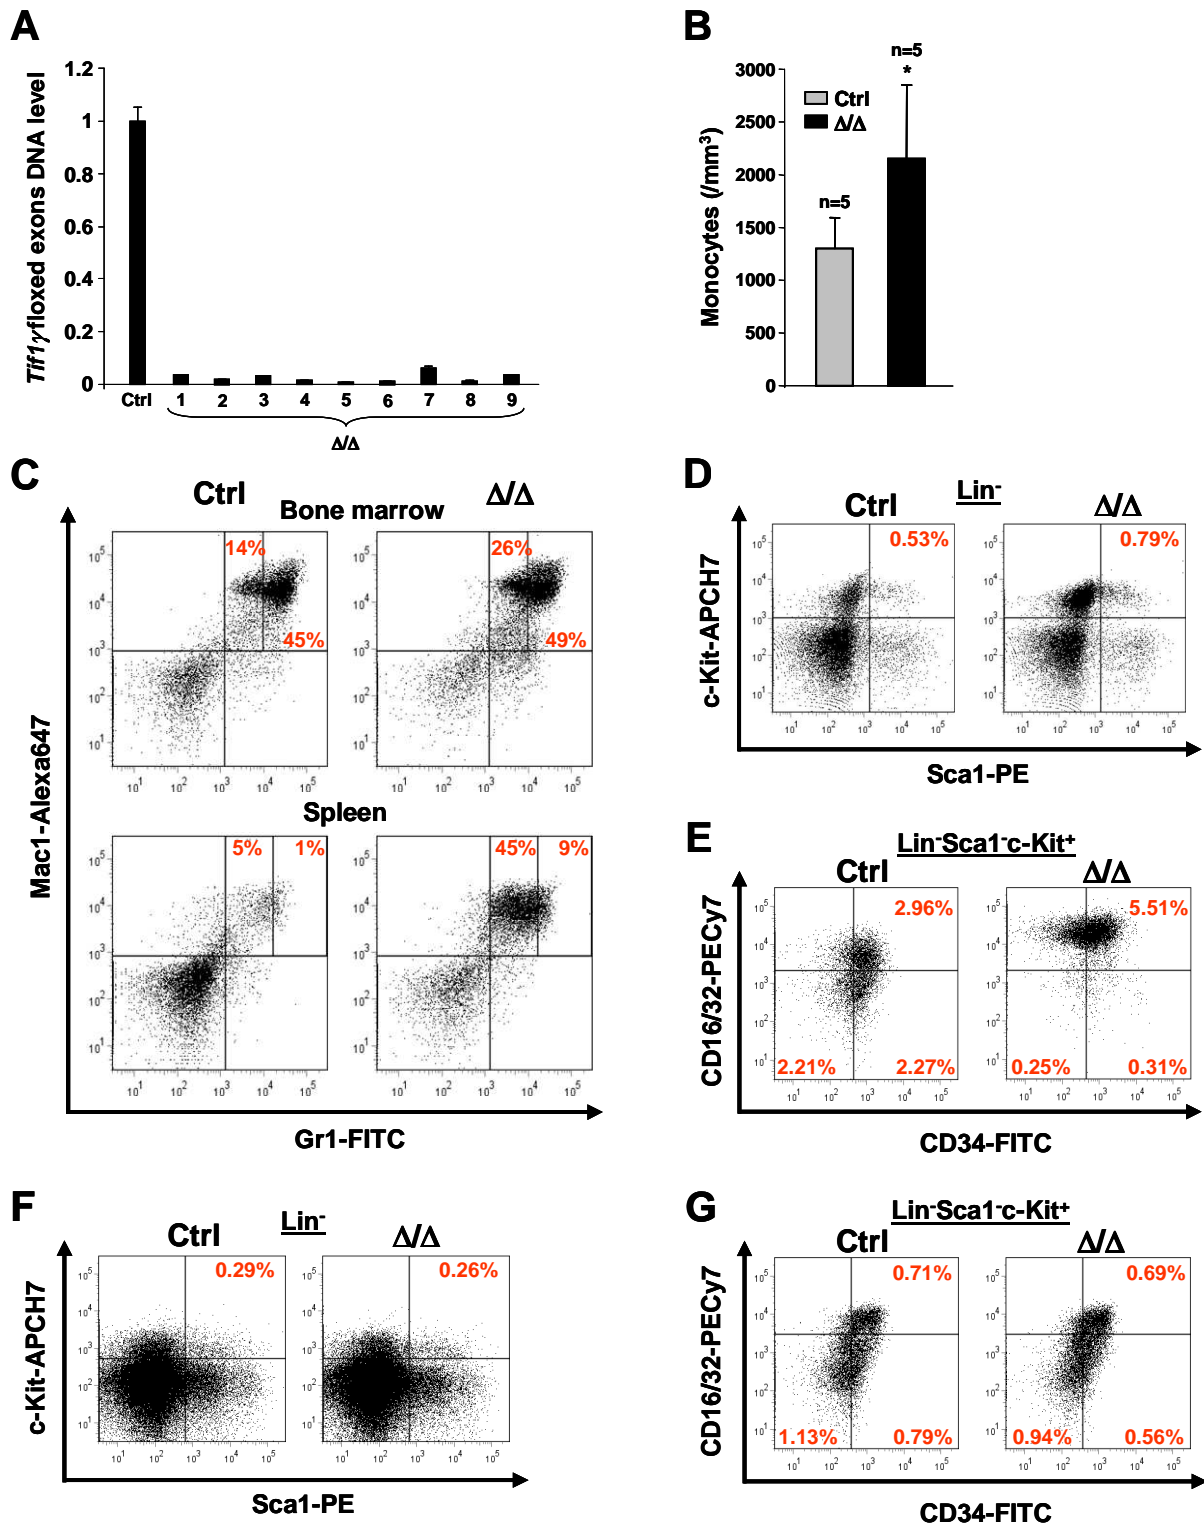

**Supplemental figure 4. Mice transplanted with *Tif1 $\gamma$  <sup>$\Delta/\Delta$</sup>  bone marrow develop a myeloproliferative disease.*** (A) Q-PCR analysis of the *Tif1 $\gamma$*  floxed exons in PB from control (Ctrl) or *Tif1 $\gamma$  <sup>$\Delta/\Delta$</sup>  ( $\Delta/\Delta$ ) transplanted mice. Data are the means  $\pm$  s.d. of the values from experiments performed in triplicate. (B) Peripheral monocyte counts in Ctrl or  $\Delta/\Delta$  transplanted mice. The results are shown as the means  $\pm$  s.d. (C) (Upper panel) Flow cytometry analysis of cell populations from total BM cells of mice transplanted with BM from representative Ctrl or  $\Delta/\Delta$  mice. (Lower panel) Flow cytometry analysis of cell populations from spleen of mice transplanted with BM from representative Ctrl or  $\Delta/\Delta$  mice. (D) Flow cytometry analysis of cell populations from total BM cells of mice transplanted with BM from representative Ctrl or  $\Delta/\Delta$  mice. (E) Representative FACS staining profiles of the progenitor populations, including CMPs (lower right panel), MEPs (lower left panel), and GMPs (upper right panel), from the respective Ctrl or  $\Delta/\Delta$  transplanted mice. (F and G) *Tif1 $\gamma$  <sup>$\Delta/\Delta$</sup>  mice transplanted with control BM cells do not develop a myeloproliferative disease. Control BM cells were transplanted into lethally irradiated  $\Delta/\Delta$  or Ctrl recipient mice. Differences observed in the distribution of LSK cells and progenitors of control mice between panels D, E and F, G may be explained by the genetic background of the recipient mice. Flow cytometry analysis of cell populations from total BM of representative control Ctrl or  $\Delta/\Delta$  mice.**

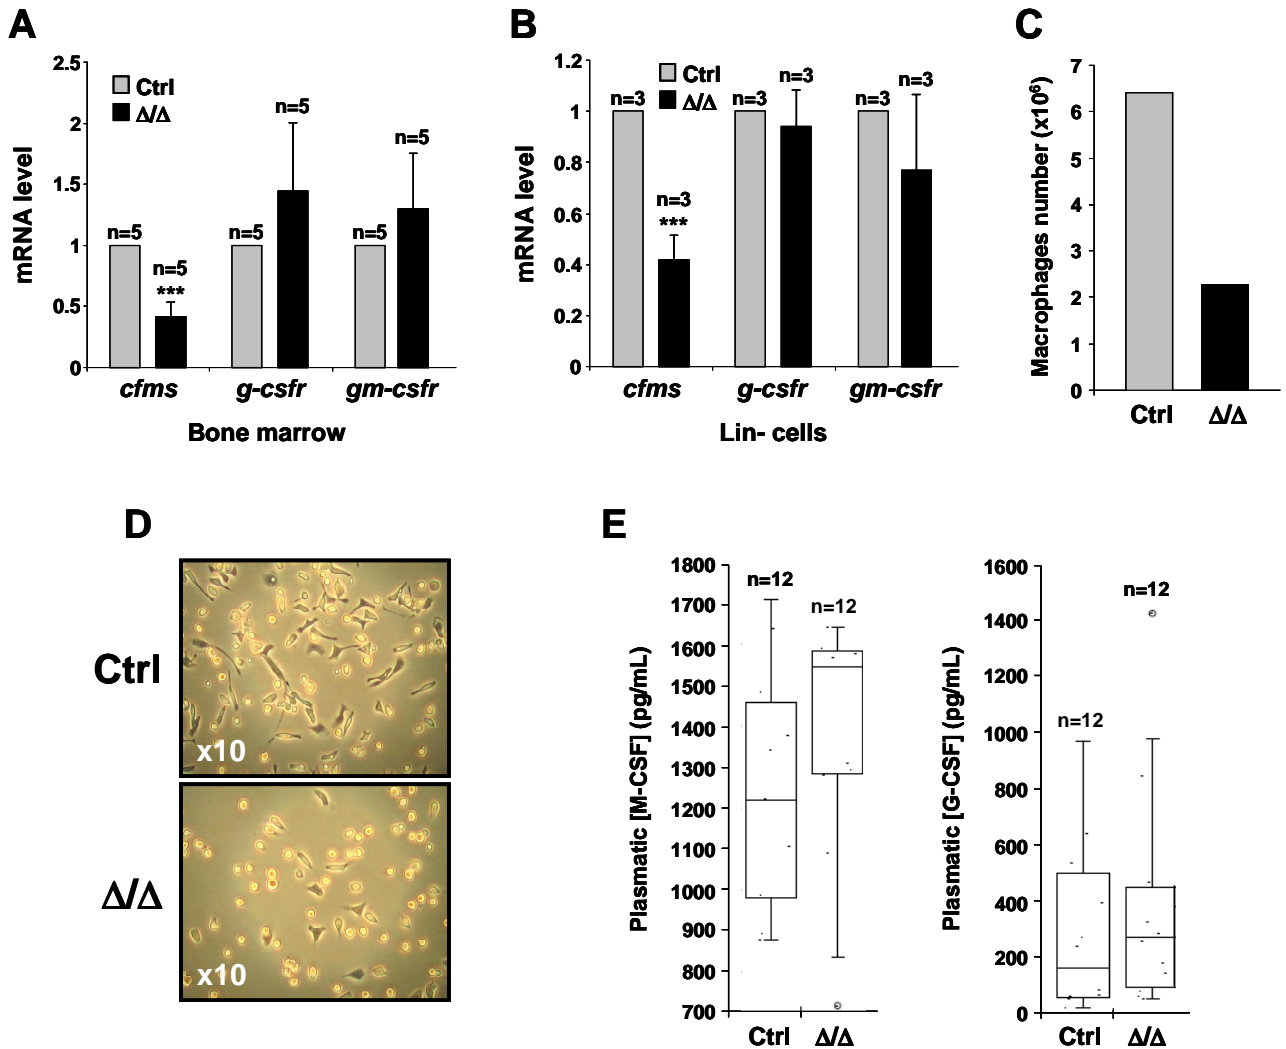

**Supplemental figure 5. *Tif1y* deficiency decreases *cfms* expression and alters macrophage differentiation.** (A) (B) RQ-PCR analysis of *cfms*, *g-csfr*, and *gm-csfr* from total BM (left panel) or Lin- cells (right panel) of control (Ctrl) or *Tif1 $\gamma^{\Delta/\Delta}$*  ( $\Delta/\Delta$ ) mice. Data are the means  $\pm$  s.d. of the values from independent experiments (\**p* values are defined in Methods). (C) *Tif1 $\gamma$*  deletion results in decreased macrophages in the peritoneum. The total number of intraperitoneal macrophages from control (Ctrl) and *Tif1 $\gamma^{\Delta/\Delta}$*  ( $\Delta/\Delta$ ) mice is summarized. (D) Photomicrographs of control (Ctrl) or *Tif1 $\gamma^{\Delta/\Delta}$*  ( $\Delta/\Delta$ ) peritoneal macrophages cultured during 24h. (E) Plasmatic concentration of M-CSF and G-CSF from control (Ctrl) and *Tif1 $\gamma^{\Delta/\Delta}$*  ( $\Delta/\Delta$ ) mice.

|                                                 | <b>Low Tif1<math>\gamma</math></b> | <b>Normal Tif1<math>\gamma</math></b> |
|-------------------------------------------------|------------------------------------|---------------------------------------|
| Number of cases                                 | 21                                 | 39                                    |
| Mean age [range]                                | 73.2 [51-91]                       | 72.1 [50-84]                          |
| Sex ratio                                       | 2                                  | 2.1                                   |
| <b>At diagnosis</b>                             |                                    |                                       |
| Mean hemoglobin g/L [range]                     | 119 [71-149]                       | 117 [84-140]                          |
| Mean platelet count 10 <sup>9</sup> /L [range]  | 155 [10-300]                       | 137 [3-379]                           |
| Mean leucocyte count 10 <sup>9</sup> /L [range] | 19.0 [3.8-92.7]                    | 14.4 [2.0-85.6]                       |
| Mean monocyte count 10 <sup>9</sup> /L [range]  | 5.1 [1-46]                         | 4.4 [1-30.8]                          |
| >13.10 <sup>9</sup> monocyte/L (%)              | 53%                                | 32%                                   |

**Supplemental table 1.** Clinical and biological characteristics of the CMML patients in whom *Tif1 $\gamma$*  mRNA expression was analyzed.

| <b>All</b>                                      |                 |
|-------------------------------------------------|-----------------|
| Number of cases                                 | 66              |
| Mean age [range]                                | 70.37 [50-93]   |
| Sex ratio                                       | 2.14            |
| <b>At diagnosis</b>                             |                 |
| Mean hemoglobin g/L [range]                     | 116 [52-163]    |
| Mean platelet count 10 <sup>9</sup> /L [range]  | 163 [3-411]     |
| Mean leucocyte count 10 <sup>9</sup> /L [range] | 14.3 [3.5-85.6] |
| Mean monocyte count 10 <sup>9</sup> /L [range]  | 3.3 [1-30.8]    |
| >13.10 <sup>9</sup> monocyte/L (%)              | 46%             |

**Supplemental table 2.** Clinical and biological characteristics of the CMML cohort used for *TIF1γ* sequencing.

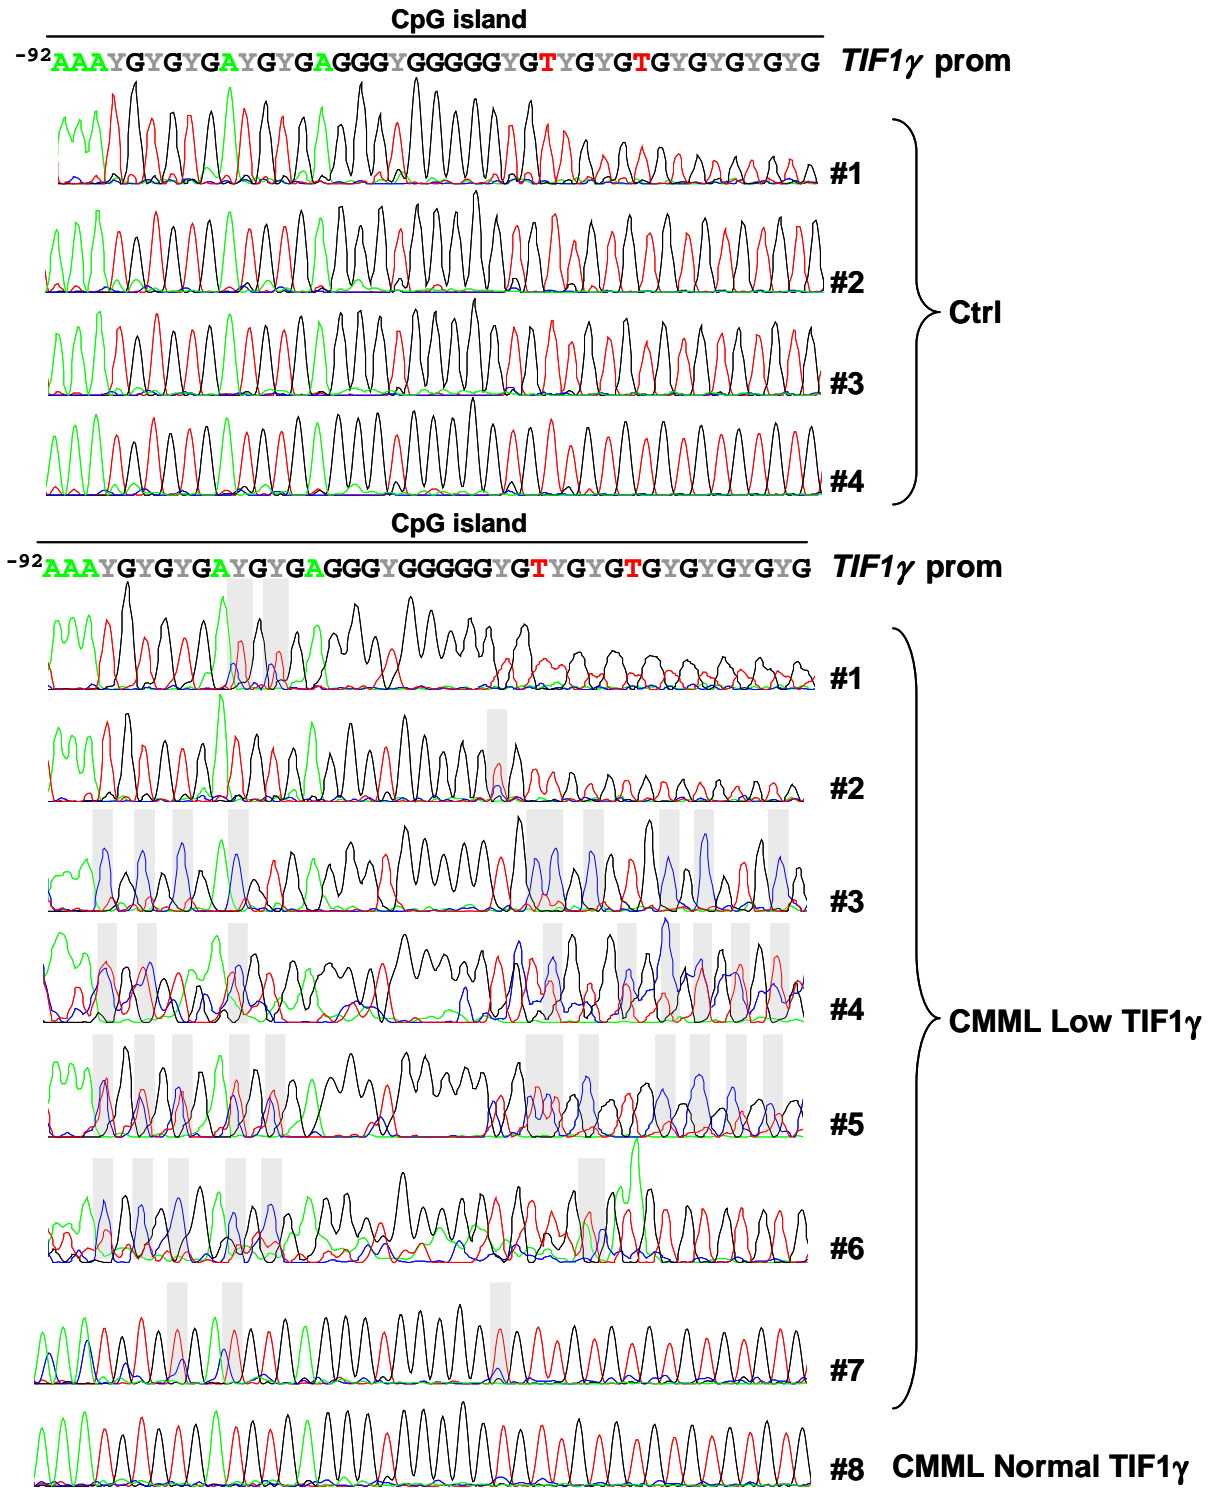

**Supplemental figure 6.** *TIF1 $\gamma$*  is an epigenetically-regulated tumor suppressor gene in CMML. Sequencing of the bisulfite modified *TIF1 $\gamma$*  promoter sequence from normal monocytes of healthy donors (Ctrl) or CMML patients. CMML patient #8 is a representative patient who harbors a normal level of *TIF1 $\gamma$* .
